# Supplementary material for: A novel efficient cationic flocculant prepared through grafting two monomers onto chitosan induced by Gamma radiation
Source: Royal Society of Chemistry journal article supplement (doi:10.1039/c1ra00473e), 2011-11-14
Supplement: c1ra00473e.pdf [file c1ra00473e.pdf]

**Electronic Supporting Information (ESI) for**

**A novel efficient cationic flocculant prepared through grafting  
two monomers onto chitosan induced by Gamma radiation**

**Jian-Ping Wang,<sup>a,b</sup> Yong-Zhen Chen,<sup>a</sup> Yi Wang,<sup>b</sup> Shi-Jie Yuan,<sup>a</sup> Guo-Ping Sheng<sup>a</sup> and Han-Qing Yu<sup>\*a</sup>**

*<sup>a</sup>Department of Chemistry, University of Science & Technology of China, Hefei, 230026, China. Fax: +86 551 3601592; Tel: +86 551 3607592; E-mail: hqyu@ustc.edu.cn*

*<sup>b</sup>Department of Agricultural and Biological Engineering, University of Illinois at Urbana-Champaign, Urbana, IL 61801, USA.*

**The following is included as additional supplementary materials for this paper:**

**Page S3 Table A:** Levels of the variable tested in the 2<sup>3</sup> central composite designs

**Page S4 Figure A:** XRD of chitosan and chitosan-g-PAM-g-PDMC

**Page S5 Figure B:** Comparison of settling rate of the floccules treated with chitosan and chitosan-g-PAM-g-PDMC at (a) pH 4.0; (b) pH 7.0; and (c) pH 10.0. -●-: chitosan; -○-: chitosan-g-PAM-g-PDMC

**Page S6 Figure C:** Images of floccules from kaolin suspension treated with: (a) no flocculant; (b) chitosan; and (c) chitosan-g-PAM-g-PDMC

**Table A** Levels of the variable tested in the  $2^3$  central composite designs

| Variable                                                          | Range and levels |      |      |      |      |
|-------------------------------------------------------------------|------------------|------|------|------|------|
|                                                                   | -2               | -1   | 0    | 1    | 2    |
| X1, coagulant dosage / mg L <sup>-1</sup>                         | 0                | 440  | 880  | 1320 | 1760 |
| X2, flocculant dosage, PAM / mg L <sup>-1</sup>                   | 0                | 10.0 | 20.0 | 30.0 | 40.0 |
| X2, flocculant dosage, chitosan-g-PAM-g-PDMC / mg L <sup>-1</sup> | 0                | 7.5  | 15.0 | 22.5 | 30.0 |
| X3, pH                                                            | 2.0              | 4.5  | 7.0  | 9.5  | 12.0 |

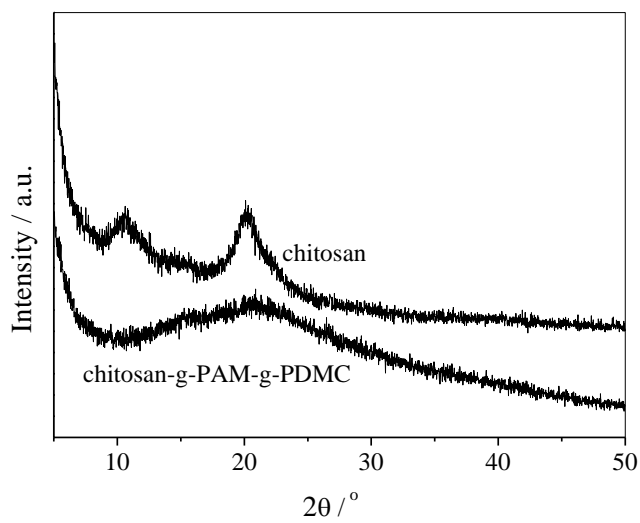

**Fig. A** XRD of chitosan and chitosan-g-PAM-g-PDMC

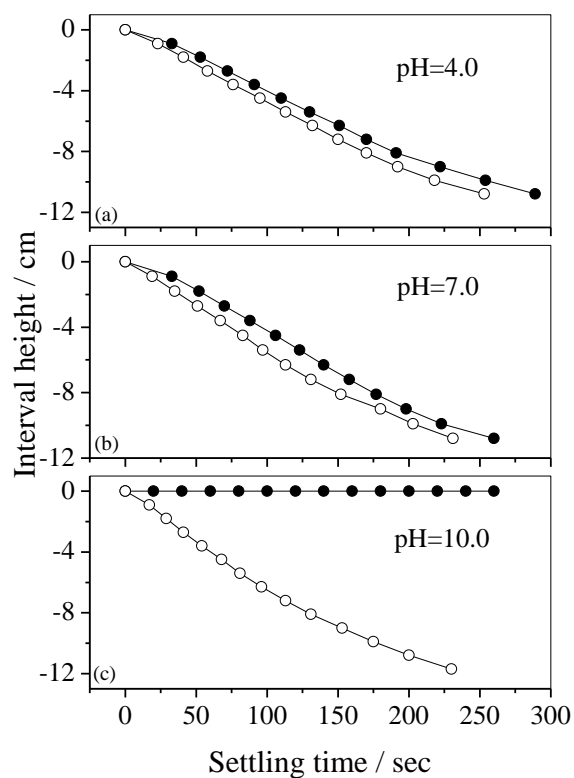

**Fig. B** Comparison of settling rate of the floccules treated with chitosan and chitosan-g-PAM-g-PDMC at (a) pH 4.0; (b) pH 7.0; and (c) pH 10.0. ●-: chitosan; ○-: chitosan-g-PAM-g-PDMC

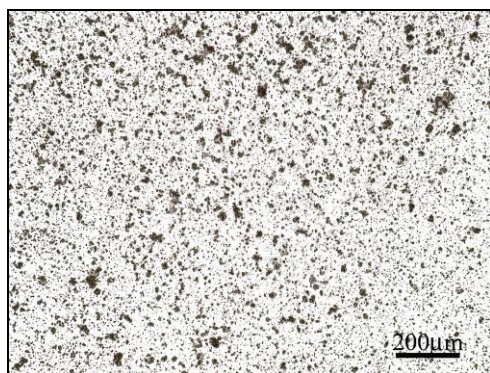

(a)

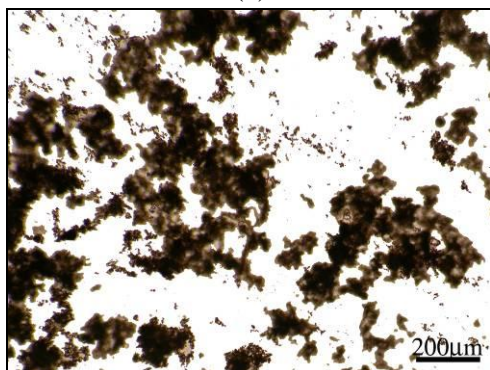

(b)

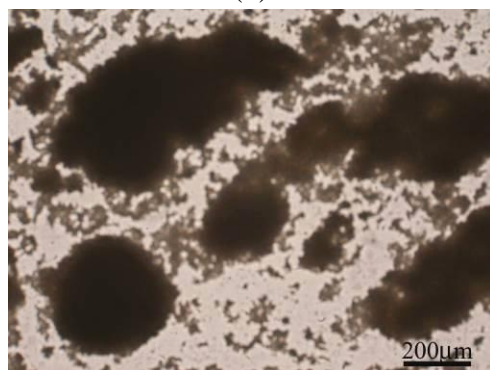

(c)

**Fig. C** Images of floccules from kaolin suspension treated with: (a) no flocculant; (b) chitosan; and (c) chitosan-g-PAM-g-PDMC
